# Supplementary material
Source: PubMed Central journal article supplement (PMC6200590)
Supplement: NIHMS1504558-supplement-5.pdf [file NIHMS1504558-supplement-5.pdf]

**Figure S1.**

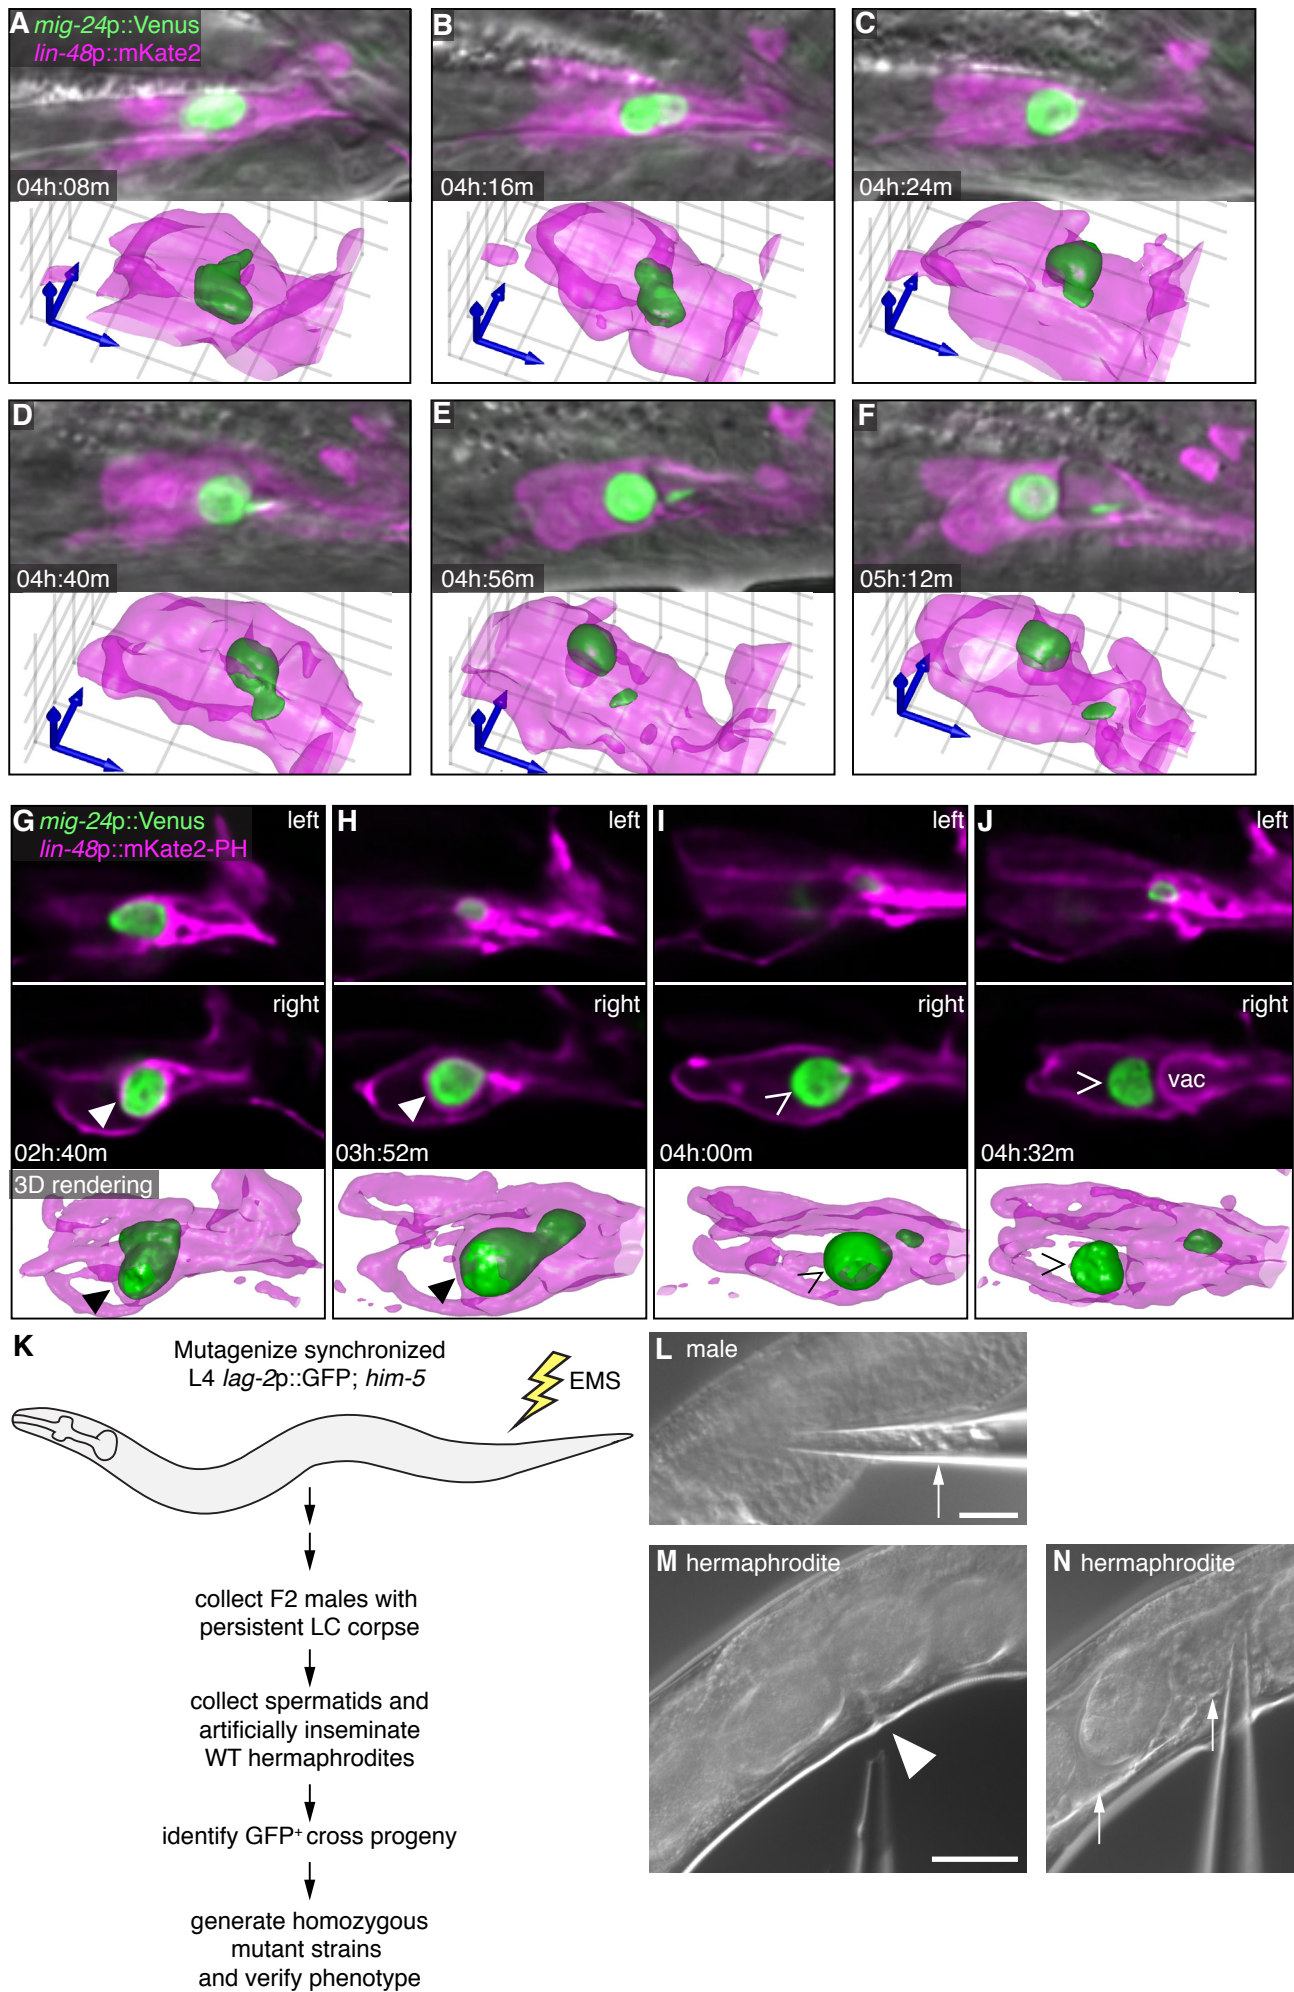

**Figure S1. Competitive phagocytosis is dynamic and subsequent genetic screen for linker cell degradation mutants. Related to Figures 1, 2 and 4.**

**(A-F)** Additional movie frames of animal shown in Figure 1, demonstrating back-and-forth tugging events leading to linker cell splitting. Scale bar, 10  $\mu\text{m}$ .

**(G-J)** Linker cell splitting correlates with loss of mKate2-PH, an open phagosome marker. Scale bar, 10  $\mu\text{m}$ . **(G-H)** Arrowhead, mKate2-PH plasma membrane marker around linker cell prior to cell splitting **(I-J)** Caret, mKate2-PH plasma membrane marker absent from phagosome after cell splitting.

**(K)** Genetic screen scheme.

**(L-N)** Artificial insemination procedure. **(L)** Needle filled with buffer plunged into a 24h mutant adult male gonadal cavity. Spermatids automatically flow into the needle (arrow). **(M)** Needle aligned with a wild type hermaphrodite vulva (arrowhead). **(N)** Needle inserted into the vulva and spermatids released. Released spermatids fill the hermaphrodite gonadal cavity (arrows).

**Figure S2.**

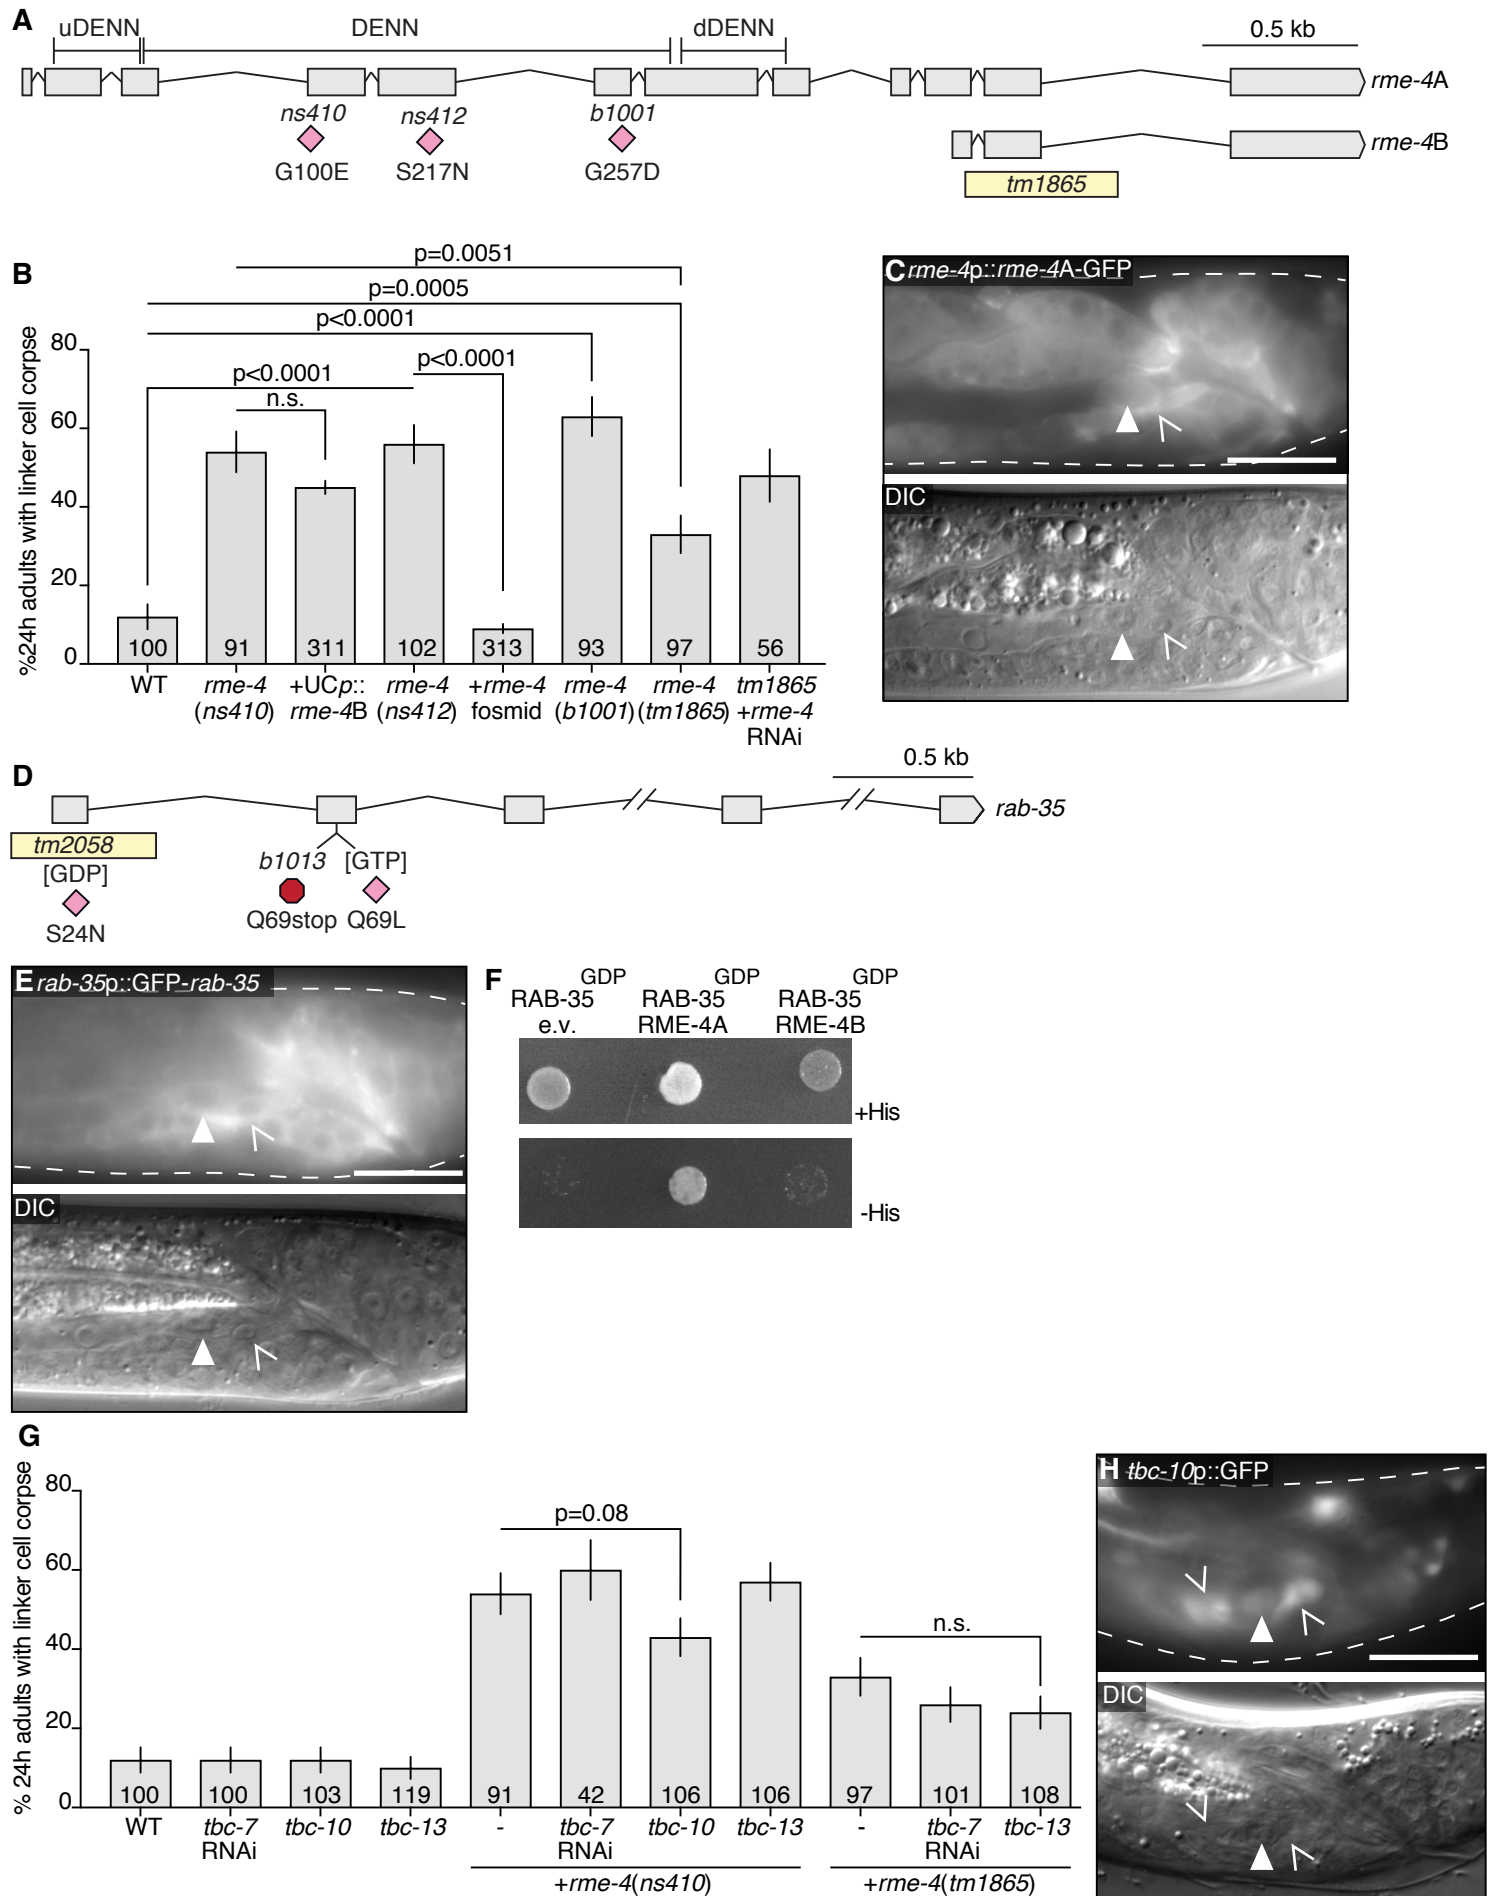

**Figure S2. RAB-35, RME-4, and TBC-10 reagents and interactions. Related to Figure 2.**

(A) *rme-4* gene locus. Pink diamonds, locations of point mutations. Yellow box, deletion allele *tm1865*.

(B) Histogram details as in Figure 2b.

(C) *rme-4* translational reporter expression. Arrowhead, linker cell. Caret, U.lp or U.rp cell. Top: GFP. Bottom: DIC. Scale bar, 10  $\mu$ m.

(D) *rab-35* gene locus. Yellow box, deletion allele *tm2058*. Pink diamonds, point mutations. Red octagon, early stop allele *b1013*.

(E) *rab-35* translational reporter expression. Arrowhead, linker cell. Caret, U.lp or U.rp cell. Top: GFP. Bottom: DIC. Scale bar, 10  $\mu$ m.

(F) Yeast two-hybrid assay with LexA-RAB-35[S24N] (GDP) as bait, and Gal4-AD (GAD) empty vector, GAD-RME-4A, or GAD-RME-4B as prey. Top: histidine present. Bottom: histidine absent. Growth on -His plates, physical interaction.

(G) Histogram details as in (B).

(H) *tbc-10* transcriptional reporter. Arrowhead, linker cell. Caret, U.l/rp cells. Top: GFP. Bottom: DIC. Scale bar, 10  $\mu$ m.

**Figure S3.**

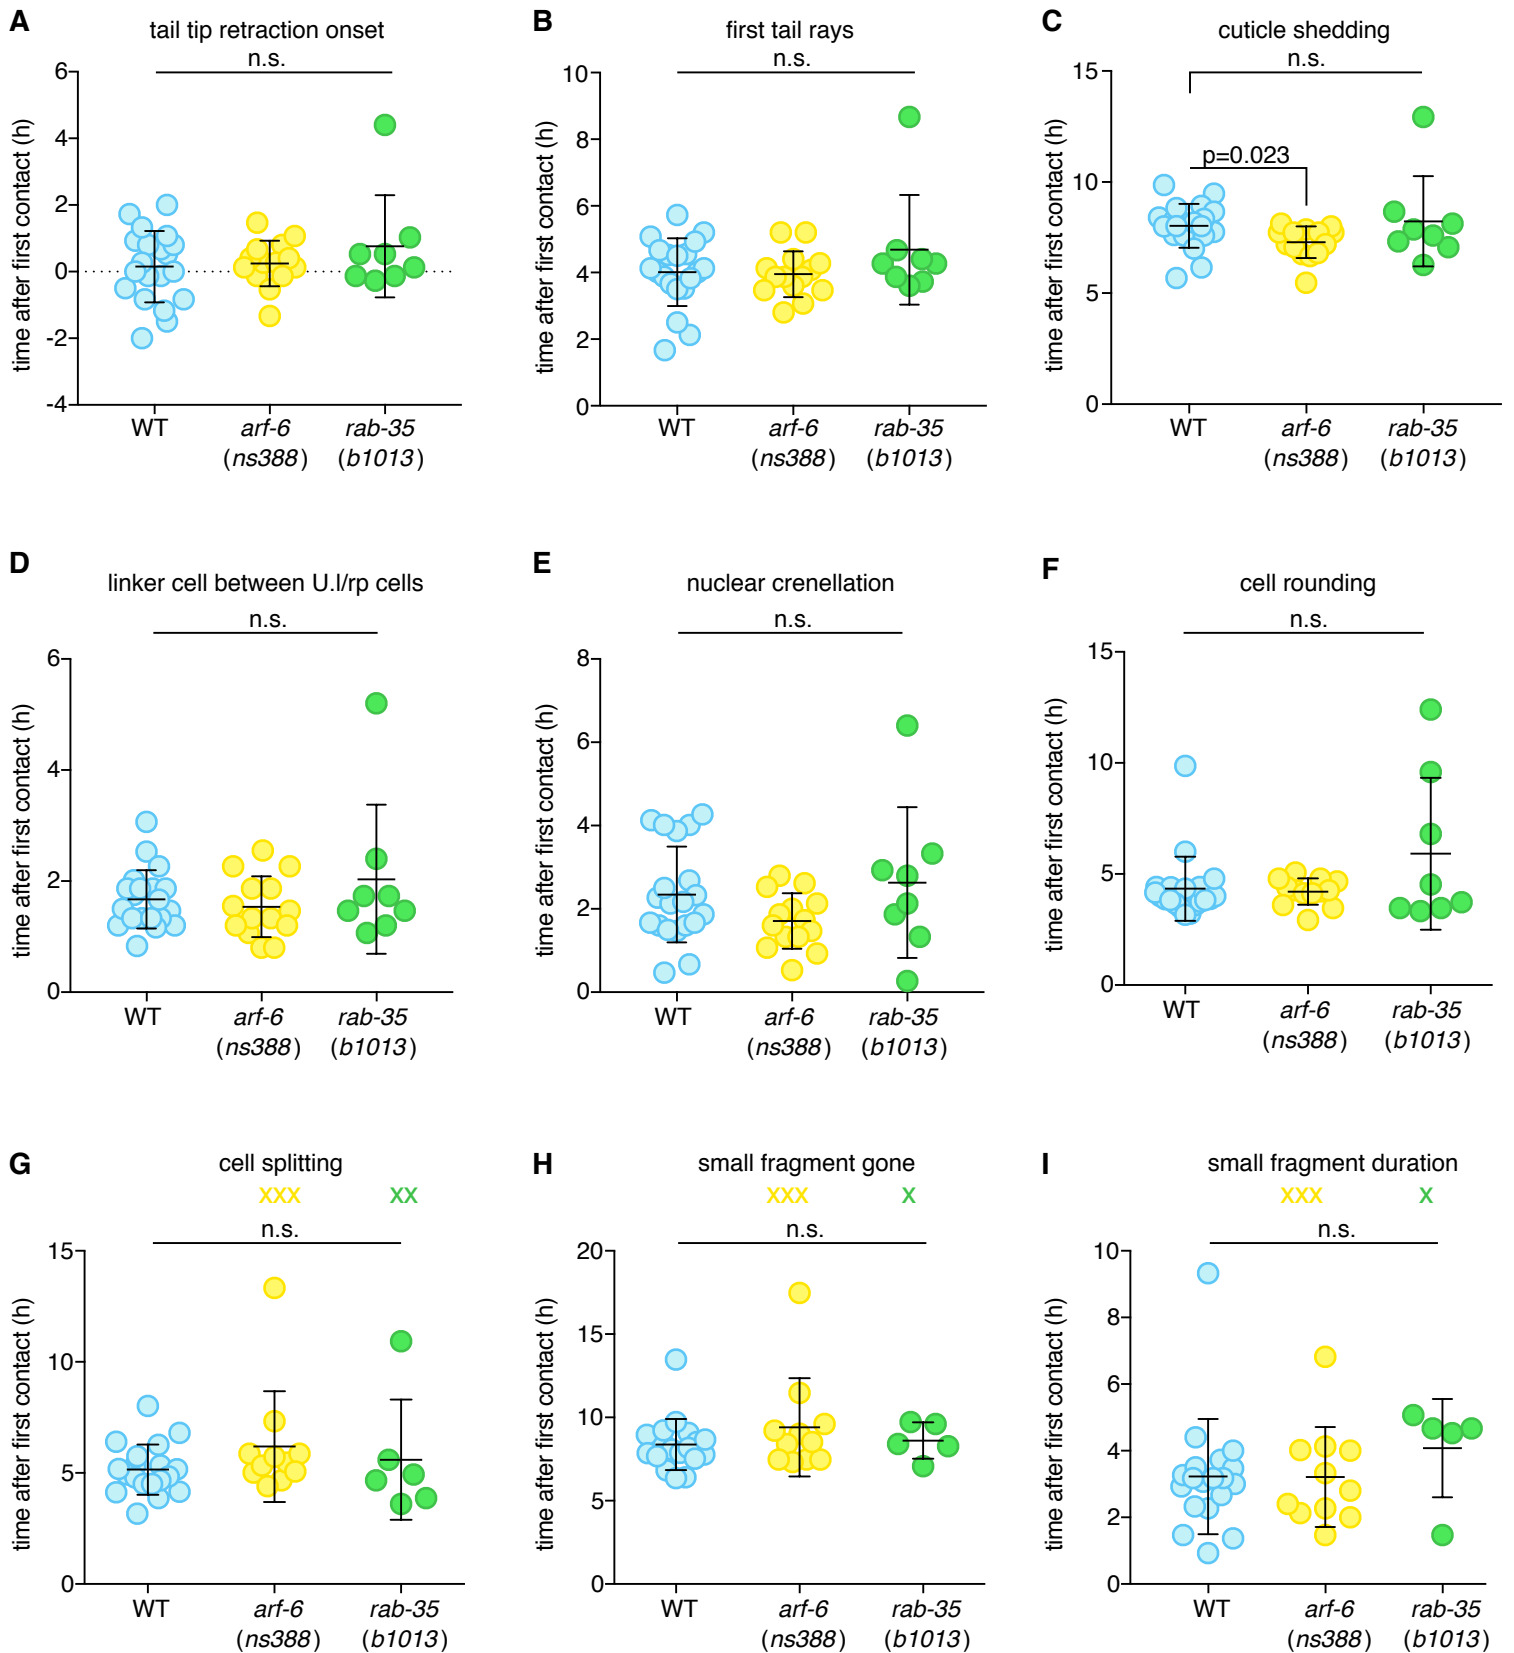

**Figure S3. Characterization of stereotypical events during linker cell clearance in *rab-35* and *arf-6* mutants. Related to Figures 1, 2, and 4.**

(A-I) Strains contain linker cell reporter [*mig-24p::Venus*], U.I/rp cell reporter [*lin-48p::mKate2*], *him-5(e1490)*. Dots, individual events in single animals in hours with respect to first contact. X, event did not occur; not factored into statistical analysis. Bars, mean  $\pm$  std. Statistical significance, Student's t-test.

**Figure S4.**

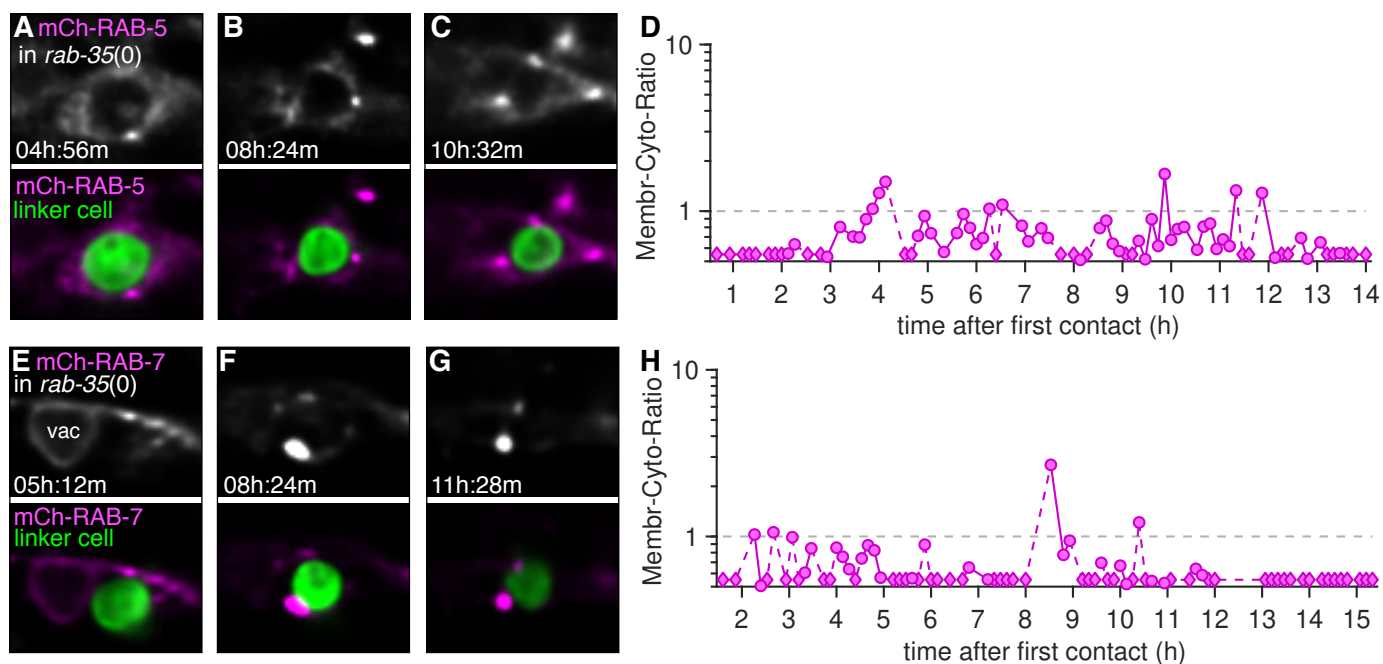

**Figure S4. RAB-5 and RAB-7 do not sustained around the phagosome membrane in the absence of RAB-35. Related to Figure 3.**

(A-C) Localization of mCh-RAB-5 (top) within the U.I/rp cells examined during linker cell (YFP) death and degradation in a *rab-35(b1013)* animal. Bottom: linker cell, green; mCh-RAB-5, magenta. Scale bar, 5  $\mu$ m. (D) Ratio of average fluorescence intensity on phagosome membrane over the cytoplasm in hours after the first contact of animal shown in adjacent images. Logarithmic scale, where 1 indicates equal amount of cytoplasmic and phagosome membrane bound fluorescence. Any data point with a ratio below 0.5 indicated with a diamond and dotted line. (E-G) Imaging details as in (A), except that mCh-RAB-7 is imaged in a *rab-35(b1013)* animal (top). Bottom: linker cell, green; mCh-RAB-7, magenta. (H) Same details as in (D).

**Figure S5.**

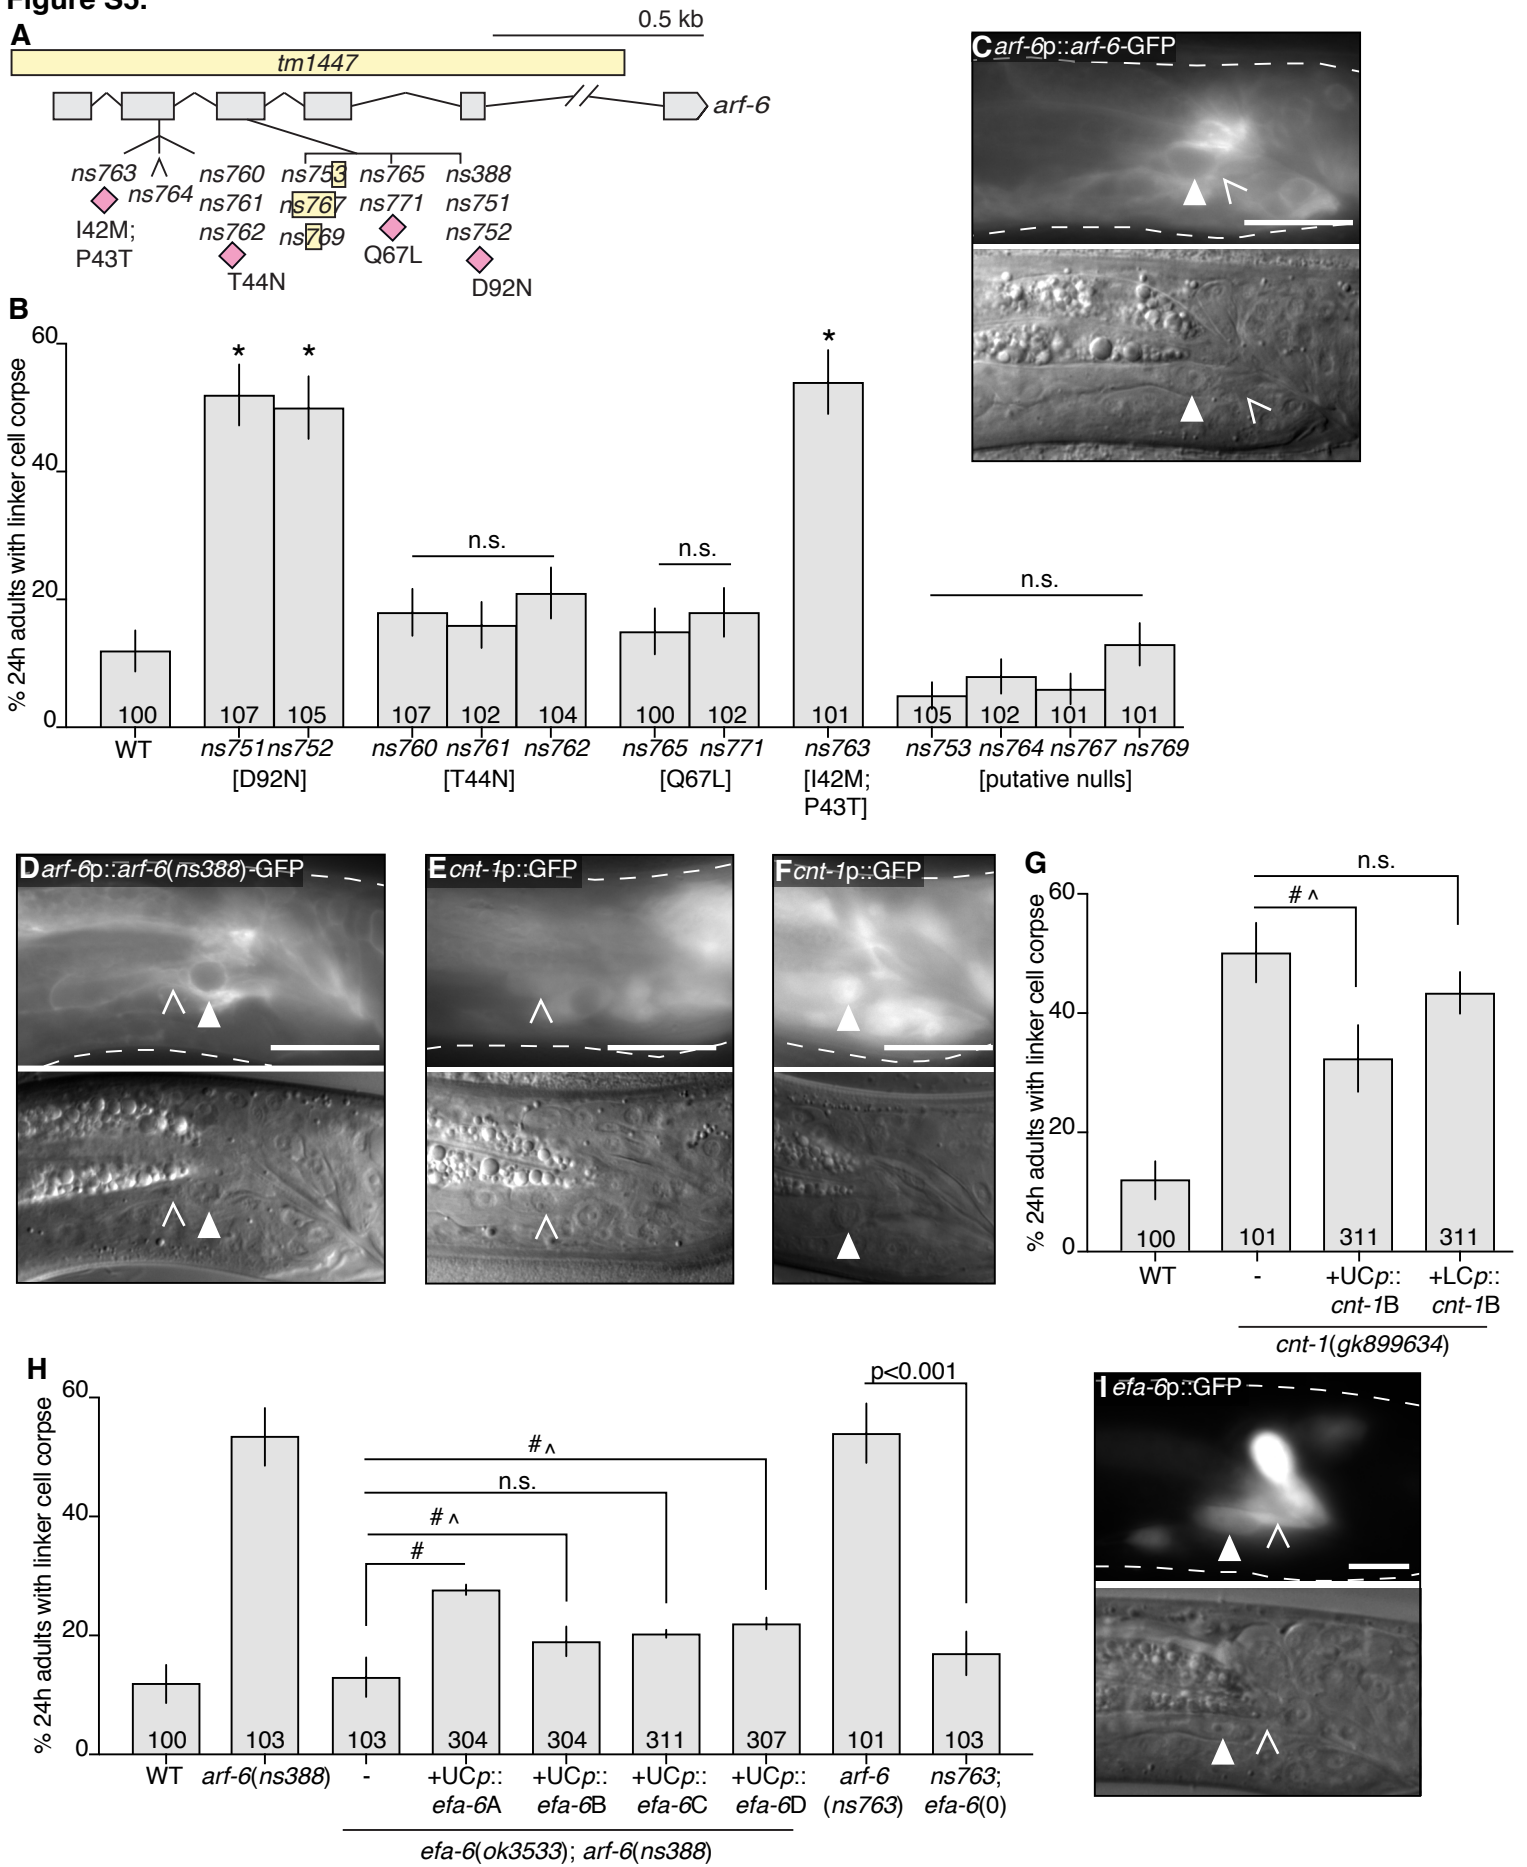

**Figure S5. CNT-1/ACAP2 and EFA-6/EFA6 regulate ARF-6. Related to Figures 4 and 6.**

(A) *arf-6* genomic locus. Yellow box, deletion alleles. Caret, single nucleotide insertion allele *ns764*. Pink diamonds, point mutations.

(B) Histogram details as in Figure 2b.

(C) *arf-6* translational reporter expression. Arrowhead, linker cell. Caret, U.l.p or U.r.p cell. Top: GFP; bottom: DIC. Scale bar, 10  $\mu$ m.

(D-F) Expression reporter for *arf-6(ns388)*, and *cnt-1*.

(G) Histogram as in B. UCp = *lin-48p*. LCp = *mig-24p*. Error bars represent standard error of the proportion or standard error of the mean. #, significantly different from both *cnt-1(gk899634)* and wild type. ^, only two lines out of three show significant rescue.

(H) Histogram as in B. UCp = *lin-48p*. LCp = *mig-24p*. Error bars represent standard error of the proportion or standard error of the mean. #, significantly different from both *efa-6(ok3533)*; *arf-6(ns388)* and *arf-6(ns388)*. ^, only one line out of three show significant rescue.

(I) *efa-6* transcriptional reporter. Annotations as in (C).



**Figure S6.**

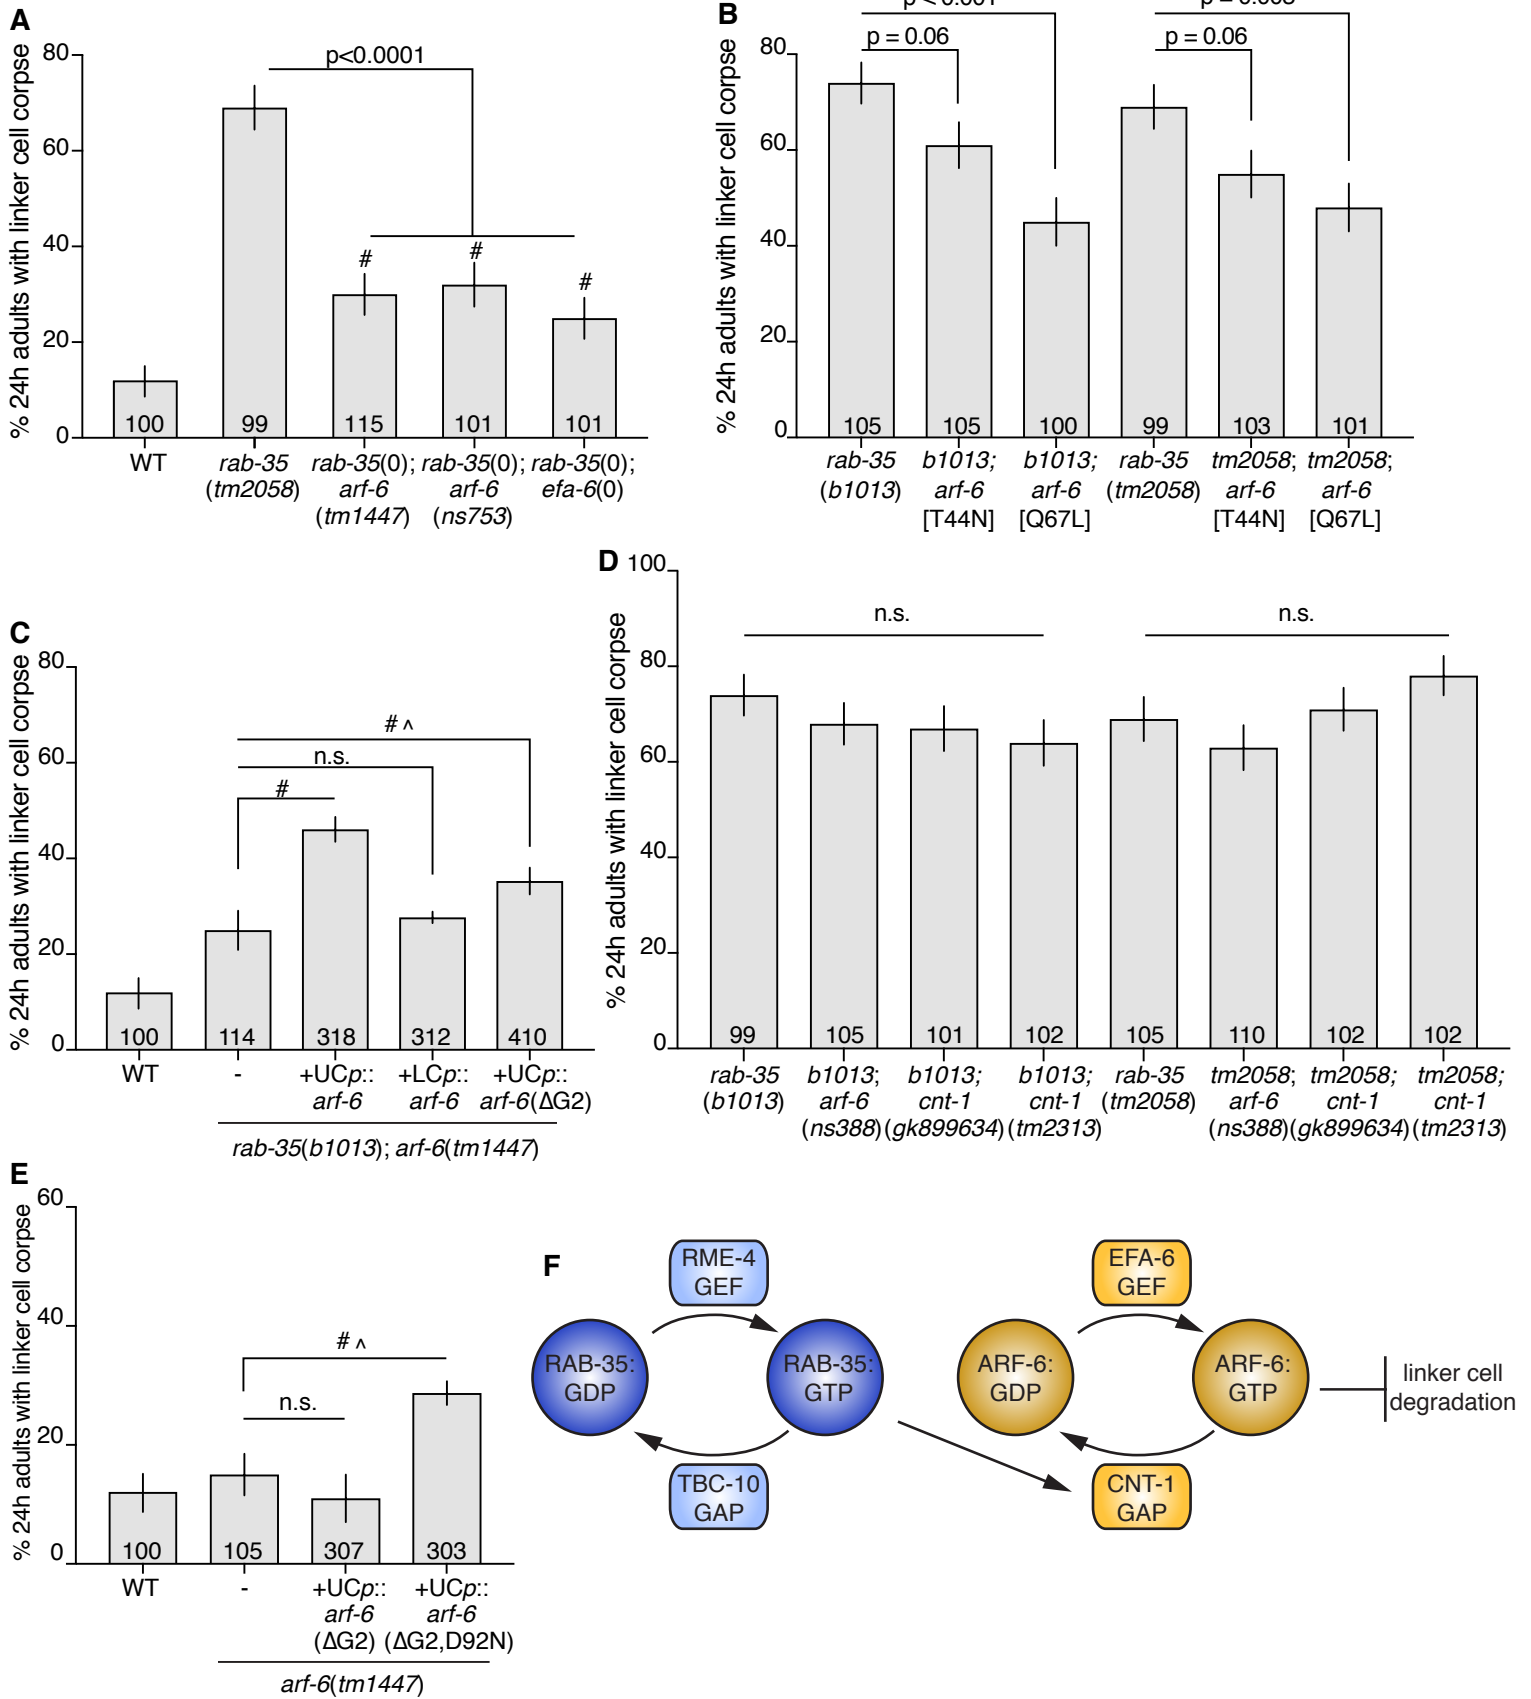

**Figure S6. RAB-35 and ARF-6 are in the same genetic pathway. Related to Figure 7.**

(A-E) Histogram details as in Figure 2B.  $\Delta G2$  = deletion of glycine2, necessary for myristoylation. #, (A) significantly different from single mutants, (C) significantly different from both *rab-35(b1013); arf-6(tm1447)* and *rab-35(b1013)*, or (E) significantly different from both *arf-6(tm1447)* and *arf-6(ns388)*.  $\wedge$ , only 2/4 lines showed significant rescue. (F) RAB-35:GTP promotes linker cell degradation by interacting with the ARF-6 GAP CNT-1. CNT-1 is required for turning ARF-6 off and removing it from the membrane. ARF-6:GTP inhibits linker cell degradation. GAP, GTPase activating protein. GEF, guanine nucleotide exchange factor.

Table S1. Reporter identity does not affect linker cell degradation (mean  $\pm$  SE of proportion). Related to Figures 1-5, 7.

| Genotype                                                       | % linker cell corpses<br>in 24h adults | N   |
|----------------------------------------------------------------|----------------------------------------|-----|
| <i>qls56</i> [LCp::GFP]                                        | 12 $\pm$ 3.2                           | 100 |
| <i>nsls65</i> [LCp::Venus]                                     | 11 $\pm$ 3.1                           | 100 |
| <i>nsls60</i> [LCp::Venus]                                     | 5 $\pm$ 2.1                            | 103 |
| <i>arf-6(ns388); nsls65</i>                                    | 64 $\pm$ 4.8                           | 101 |
| <i>rab-35(b1013); nsls65</i>                                   | 79 $\pm$ 4.0                           | 102 |
| <i>nsls589</i> [UCp::mKate2]; <i>nsls65</i>                    | 5 $\pm$ 5.0                            | 101 |
| <i>arf-6(ns388); nsls589; nsls65</i>                           | 57 $\pm$ 6.6                           | 56  |
| <i>rab-35(b1013); nsls589; nsls65</i>                          | 54 $\pm$ 8.4                           | 35  |
| <i>nsls653</i> [UCp::mKate2-PH]; <i>nsls65</i>                 | 1 $\pm$ 1.0                            | 104 |
| <i>nsls60; nsls622</i> [UCp::mCh-RAB-5]                        | 0                                      | 100 |
| <i>nsls592</i> [UCp::mCh-RAB-7]; <i>nsls65</i>                 | 8 $\pm$ 2.8                            | 91  |
| <i>nsls586</i> [UCp::CTNS-1-mKate2]; <i>nsls65</i>             | 3 $\pm$ 1.7                            | 101 |
| <i>nsls650</i> [LCp::mKate2]                                   | 4 $\pm$ 2.0                            | 101 |
| <i>nsls595</i> [UCp::YFP-RAB-35]; <i>nsls650</i>               | 2 $\pm$ 1.4                            | 101 |
| <i>rab-35(b1013); nsls595; nsls650</i>                         | 1 $\pm$ 1.0                            | 100 |
| <i>arf-6(tm1447); nsls595; nsls650</i>                         | 3 $\pm$ 1.7                            | 101 |
| <i>nsls625</i> [UCp::ARF-6-YFP]; <i>nsls650</i>                | 10 $\pm$ 3.9                           | 59  |
| <i>arf-6(tm1447); nsls625; nsls650</i>                         | 4 $\pm$ 2.6                            | 55  |
| <i>rab-35(b1013); nsls625; nsls650</i>                         | 51 $\pm$ 6.9                           | 53  |
| <i>arf-6(tm1447); rab-35(b1013); nsls625; nsls650</i>          | 43 $\pm$ 5.2                           | 90  |
| <i>nsls636</i> [UCp::ARF-6 (D92N)-YFP]; <i>nsls650</i>         | 56 $\pm$ 4.9                           | 101 |
| <i>rab-35(b1013); nsls713</i> [UCp::YFP-RAB-35]; <i>nsls65</i> | 0                                      | 53  |

UCp = *lin-48p*; LCp = *mig-24p*, except for *qls56*, which is *lag-2p*. All animals carried a *him-5(e1490)* mutation in addition to the transgenes listed above.

Table S2. Canonical apoptotic engulfment genes play a minor role in linker cell corpse removal (mean  $\pm$  SE of proportion). Related to Figure S1.

| Genotype                         | Mammalian homolog           | % linker cell corpses in 24h adults | N   |
|----------------------------------|-----------------------------|-------------------------------------|-----|
| WT                               |                             | 12 $\pm$ 3.2                        | 100 |
| <i>ced-1(e1735)</i>              | CD91                        | 14 $\pm$ 3.4                        | 103 |
| <i>ced-6(n2095)<sup>a</sup></i>  | Gulp                        | 9 $\pm$ 2.9                         | 100 |
| <i>ced-7(n1892)</i>              | ABCA                        | 7 $\pm$ 2.3                         | 120 |
| <i>ced-2(e1752)<sup>a</sup></i>  | CrkII                       | 20 $\pm$ 4.0*                       | 102 |
| <i>ced-5(n1812)<sup>a</sup></i>  | Dock180                     | 12 $\pm$ 2.9                        | 125 |
| <i>ced-12(k149)</i>              | Elmo                        | 27 $\pm$ 4.5*                       | 96  |
| <i>ced-10(n1993)</i>             | Rac1                        | 26 $\pm$ 4.5*                       | 97  |
| <i>ced-1; ced-5</i>              |                             | 21 $\pm$ 3.2                        | 162 |
| <i>ced-7; ced-10</i>             |                             | 27 $\pm$ 4.5*                       | 98  |
| <i>nuc-1(e1392)</i>              | DNaseII                     | 31 $\pm$ 4.5**                      | 104 |
| <i>cep-1(gk138)</i>              | p53                         | 12 $\pm$ 3.2                        | 103 |
| <i>ced-8(n1891)</i>              | XK                          | 7 $\pm$ 2.5                         | 104 |
| <i>dyn-1(ky51)</i>               | dynamain                    | 22 $\pm$ 4.1                        | 103 |
| <i>cdc-42(gk388)<sup>b</sup></i> | Cdc42                       | 17 $\pm$ 7.8                        | 23  |
| <i>ttr-52(tm2003)</i>            | transthyretin-like          | 7 $\pm$ 2.5                         | 101 |
| <i>ttr-52(tm2078)</i>            | transthyretin-like          | 4 $\pm$ 1.9                         | 102 |
| <i>psr-1(ok714)</i>              | phosphatidylserine receptor | 7 $\pm$ 2.5                         | 103 |
| <i>psr-1(tm469)</i>              | phosphatidylserine receptor | 4 $\pm$ 2.6                         | 56  |
| <i>piki-1(ok2346)</i>            | PI3K                        | 13 $\pm$ 3.4                        | 94  |
| <i>unc-108(n3263)</i>            | Rab2                        | 5 $\pm$ 2.3                         | 88  |
| <i>sand-1(or552)</i>             | Mon1                        | 38 $\pm$ 4.9***                     | 97  |
| <i>sand-1(ok1963)</i>            | Mon1                        | 58 $\pm$ 4.8***                     | 104 |
| <i>rab-7(ok511)<sup>b</sup></i>  | Rab7                        | 79 $\pm$ 9.5***                     | 19  |
| <i>rme-1(b1045)<sup>c</sup></i>  | EHD4                        | 19 $\pm$ 6.1                        | 42  |
| <i>scav-1(ok2598)</i>            | Scarb1                      | 12 $\pm$ 5.1                        | 41  |
| <i>scav-2(ok877)</i>             | CD36                        | 4 $\pm$ 2.7                         | 54  |
| <i>scav-3(ok1286)</i>            | CD36                        | 3 $\pm$ 2.1                         | 64  |
| <i>scav-5(ok1606)</i>            | Scarb1                      | 5 $\pm$ 2.9                         | 56  |
| <i>cdh-3(gk178860)</i>           | cadherin                    | 13 $\pm$ 4.5                        | 56  |
| <i>cdh-3(pk87)</i>               | cadherin                    | 3 $\pm$ 2.8                         | 36  |

<sup>a</sup>*nsls1[lag-2p::GFP, rol-6(+)]*; <sup>b</sup>Strain maintained with *mIn1* balancer; <sup>c</sup>*nsls65[mig-24p::Venus]*; *him-8*; \*:  $p < 0.05$ , Fisher's exact test; \*\*:  $p < 0.005$ , Fisher's exact test; \*\*\*:  $p < 0.0001$ , Fisher's exact test. All animals carried a *him-5(e1490)* mutation and *qls56[lag-2p::GFP]* linker cell marker, unless otherwise noted.

Table S3. Other putative ARF-6 GAPs have no linker cell defect (mean  $\pm$  SE of proportion). Related to Figure 6.

| Genotype                  | % linker cell corpses<br>in 24h adults | N   | homolog         |
|---------------------------|----------------------------------------|-----|-----------------|
| WT                        | 12 $\pm$ 3.2                           | 100 |                 |
| <i>F23H11.4(gk585084)</i> | 8 $\pm$ 4.3                            | 39  | ARAP1-3/ ArfGAP |
| <i>F23H11.4(gk165637)</i> | 13 $\pm$ 3.4                           | 96  | ARAP1-3/ ArfGAP |
| <i>git-1(ok1848)</i>      | 10 $\pm$ 3.9                           | 59  | GIT1            |
| <i>git-1(gk392605)</i>    | 15 $\pm$ 5.6                           | 41  | GIT1            |
| <i>gap-2(ok1001)</i>      | 10 $\pm$ 4.2                           | 52  | SynGAP/RasGAP   |
| <i>cnt-2(gm377)</i>       | 12 $\pm$ 3.2                           | 102 | ArfGAP          |

All animals carried a *him-5(e1490)* mutation and *qls56[lag-2p::GFP]* linker cell marker.

Table S4. Mutations in the canonical apoptotic engulfment genes *ced-1* and *ced-5* do not enhance mutations in *rab-35* (mean  $\pm$  SE of proportion). Related to Figure 2.

| Genotype                            | % linker cell corpses in 24h adults | N   |
|-------------------------------------|-------------------------------------|-----|
| WT                                  | 12 $\pm$ 3.2                        | 100 |
| <i>ced-1(e1735)</i>                 | 14 $\pm$ 3.4                        | 103 |
| <i>ced-5(n1812)</i> <sup>a</sup>    | 12 $\pm$ 2.9                        | 125 |
| <i>rab-35(b1013)</i>                | 74 $\pm$ 4.2                        | 105 |
| <i>rab-35(tm2058)</i>               | 69 $\pm$ 4.6                        | 99  |
| <i>ced-1; rab-35(b1013)</i>         | 77 $\pm$ 4.2                        | 101 |
| <i>ced-5; rab-35(b1013)</i>         | 63 $\pm$ 4.8                        | 101 |
| <i>ced-1; ced-5; rab-35(b1013)</i>  | 62 $\pm$ 4.8                        | 103 |
| <i>ced-1; rab-35(tm2058)</i>        | 56 $\pm$ 4.9                        | 102 |
| <i>ced-5; rab-35(tm2058)</i>        | 58 $\pm$ 4.9                        | 102 |
| <i>ced-1; ced-5; rab-35(tm2058)</i> | 63 $\pm$ 4.7                        | 104 |

<sup>a</sup>*nsls1[lag-2p::GFP, rol-6(+)]*. All animals carried a *him-5(e1490)* mutation and *qls56[lag-2p::GFP]* linker cell marker, unless otherwise noted.
